# Supplementary material for: Guideline adherence in bone-targeted treatment of cancer patients with bone metastases in Germany
Source: Springer Nature journal article supplement (doi:10.1007/s00520-019-05018-2), 2019-08-14

# Guideline adherence in bone targeted treatment of cancer patients with bone metastases in Germany

Hartmut Link<sup>1</sup>

Ingo Diehl<sup>2</sup>

Carsten-H. Ohlmann<sup>3</sup>

Laura Holtmann<sup>4</sup>

Markus Kerkmann<sup>4</sup>

for the Associations Supportive Care in Oncology (AGSMO), Medical Oncology (AIO), Urological Oncology (AUO), within the German Cancer Society (DKG) and the German Osteoncological Society (DOG)

<sup>1</sup>Hämatologie, Onkologie, Pfaffplatz 10A, D- 67655 Kaiserslautern  
+49 631 14102, hlink@kabelmail.de

<sup>2</sup>Praxisklinik am Rosengarten, Augustaanlage 7-11, D-68165 Mannheim

<sup>3</sup>Malteser Krankenhaus Bonn/Rhein-Sieg, Von-Hompesch-Str.1, 53123 Bonn

<sup>4</sup>MMF GmbH, Heideblick 59, D-44229 Dortmund

all in Germany

Figure 3: Use of different bisphosphonates in lung, breast and prostate cancer.  
 Pts with osteoprotective treatment

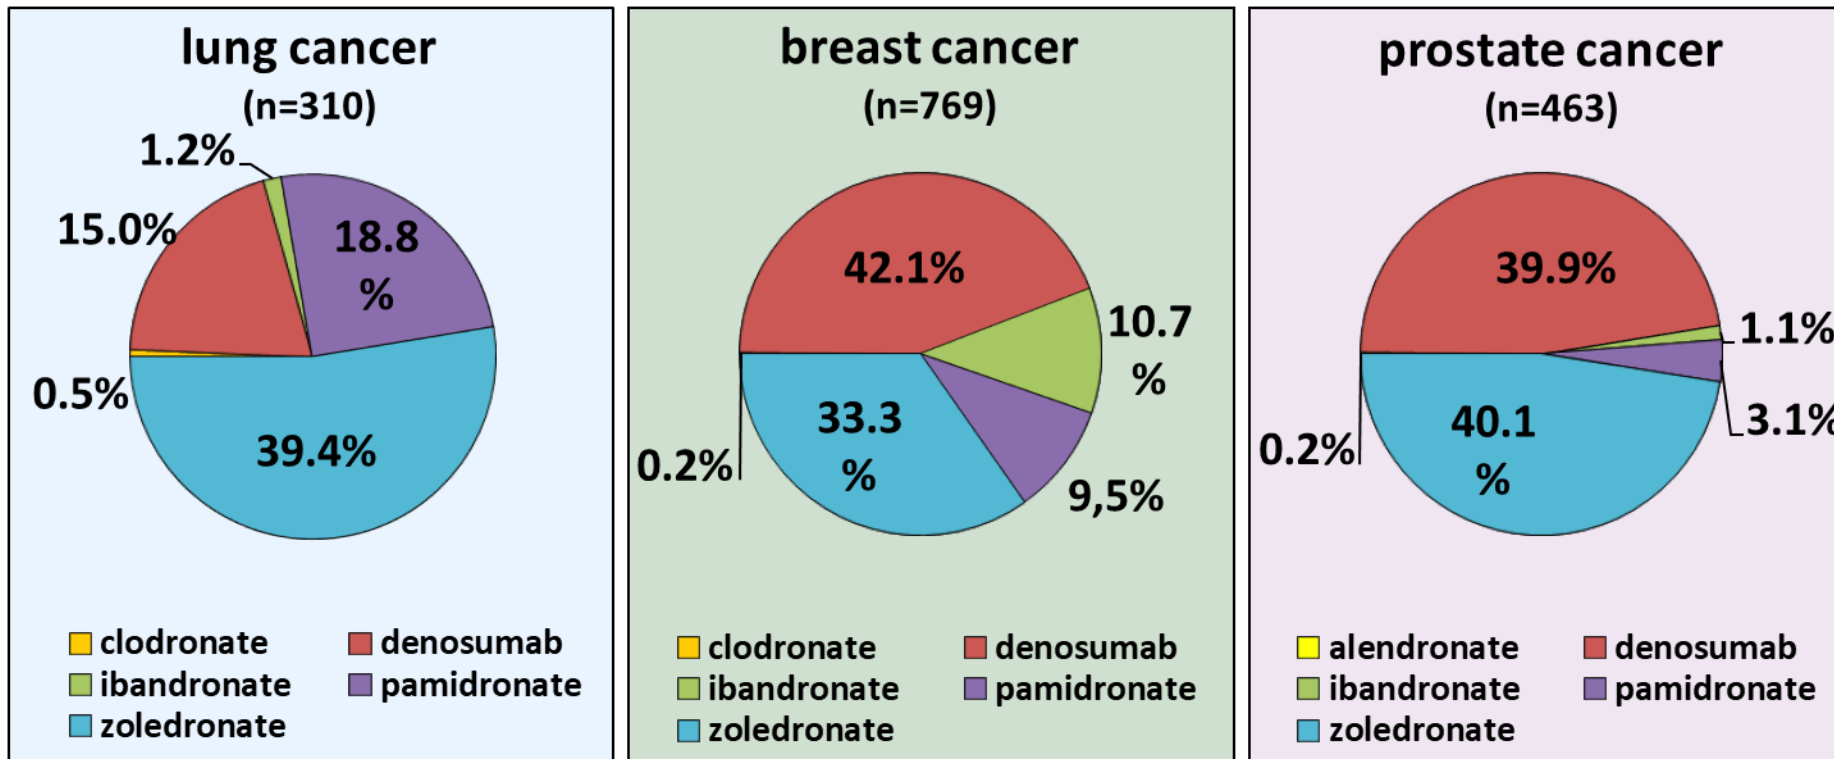

Figure 4A: systemic or radiotherapy, osteoprotective treatment and bone pain

\* Kruskal-Wallis-test

**all indications (n= 1766)**

■ systemic or radiotherapy with osteoprotective treatment (n=1211)   
 ■ systemic or radiotherapy without osteoprotective treatment (n=374)  
■ no systemic or radiotherapy, but osteoprotective treatment (n=91)   
 ■ no systemic or radiotherapy, no osteoprotective treatment (n=90)

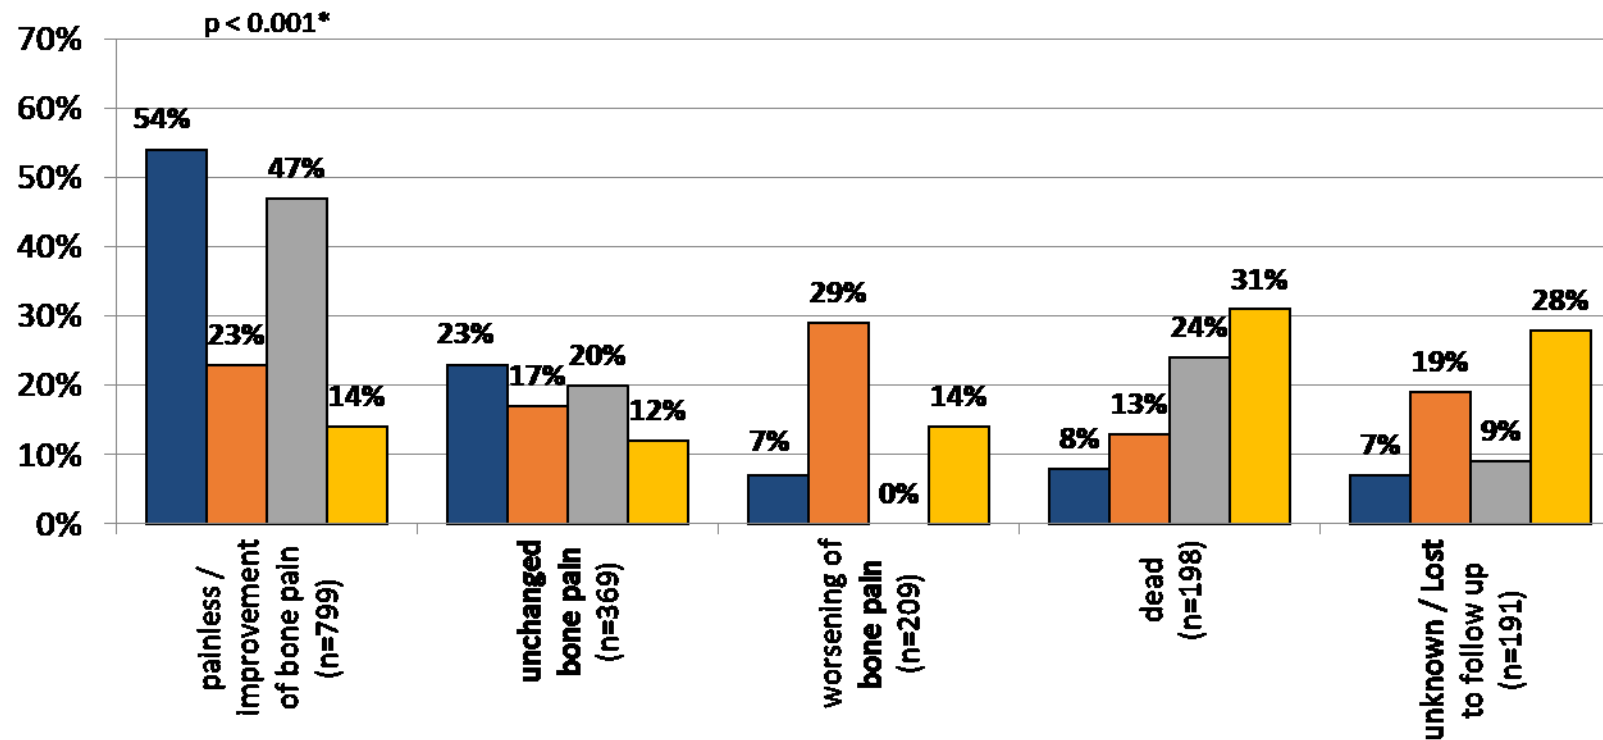

Figure 4B: systemic or radiotherapy, osteoprotective treatment and bone pain

\* Kruskal-Wallis-test

lung cancer (n= 414)

- systemic or radiotherapy with osteoprotective treatment (n=180)
- systemic or radiotherapy without osteoprotective treatment (n=155)
- no systemic or radiotherapy, but osteoprotective treatment (n=27)
- no systemic or radiotherapy, no osteoprotective treatment (n=52)

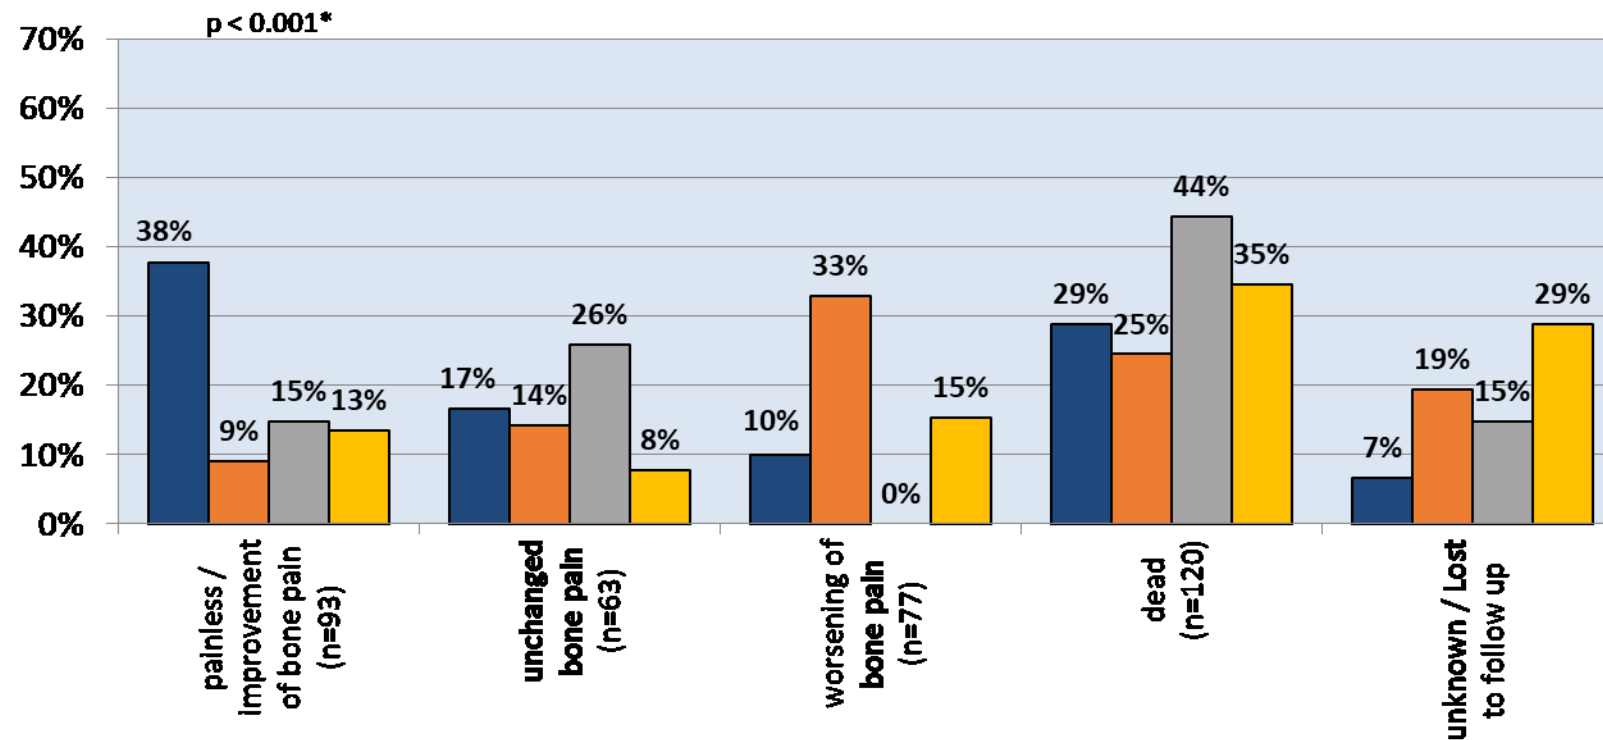

Figure 4C: systemic or radiotherapy, osteoprotective treatment and bone pain

\* Kruskal-Wallis-test

**breast cancer (n= 803)**

■ systemic or radiotherapy with osteoprotective treatment (n=675)    
 ■ systemic or radiotherapy without osteoprotective treatment (n=81)

■ no systemic or radiotherapy, but osteoprotective treatment (n=24)    
 ■ no systemic or radiotherapy, no osteoprotective treatment (n=23)

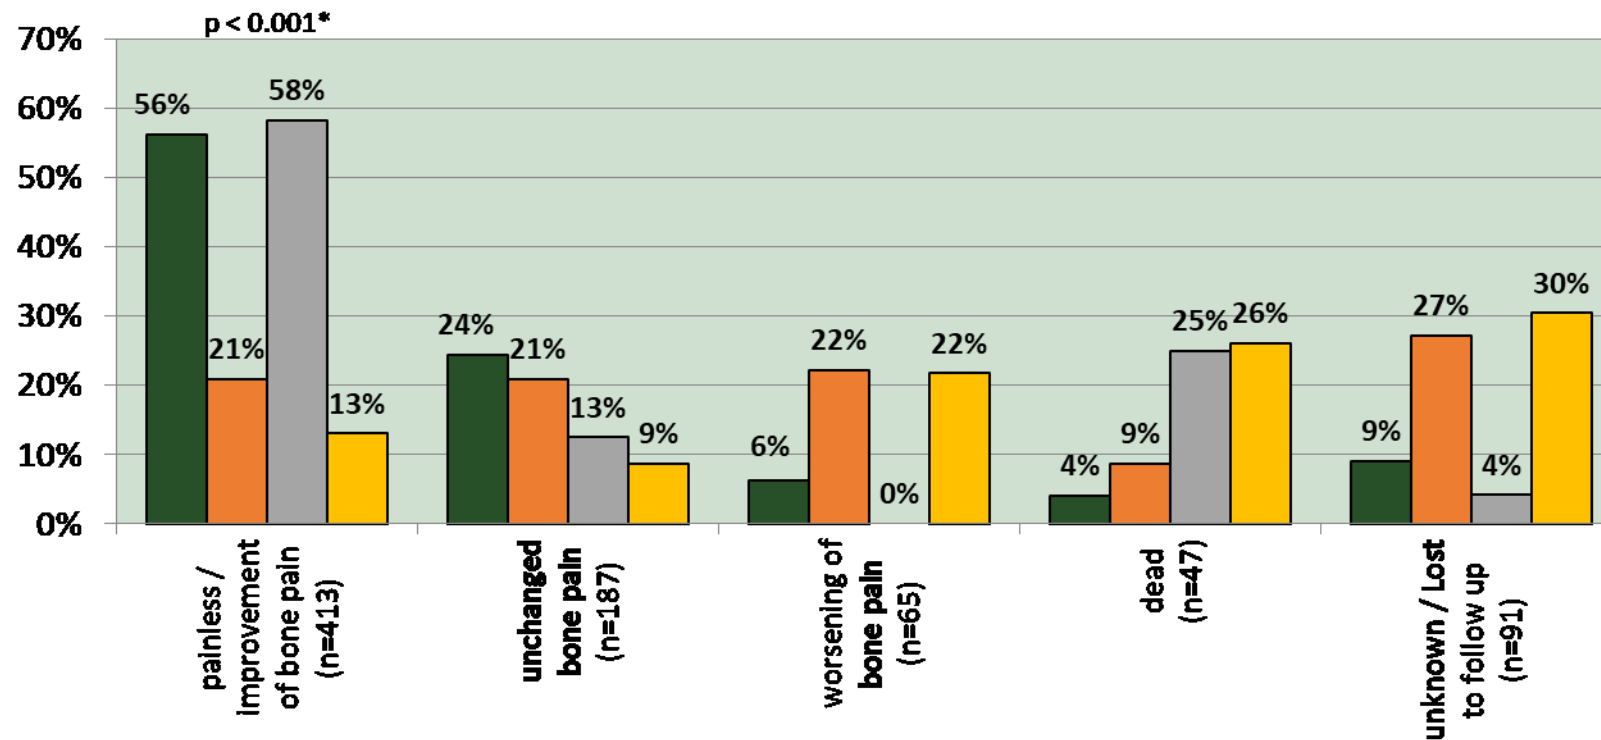

Figure 4D: systemic or radiotherapy, osteoprotective treatment and bone pain

\* Kruskal-Wallis-test

**prostate cancer (n= 549)**

- systemic or radiotherapy with osteoprotective treatment (n=356)
- systemic or radiotherapy without osteoprotective treatment (n=138)
- no systemic or radiotherapy, but osteoprotective treatment (n=40)
- no systemic or radiotherapy, no osteoprotective treatment (n=15)

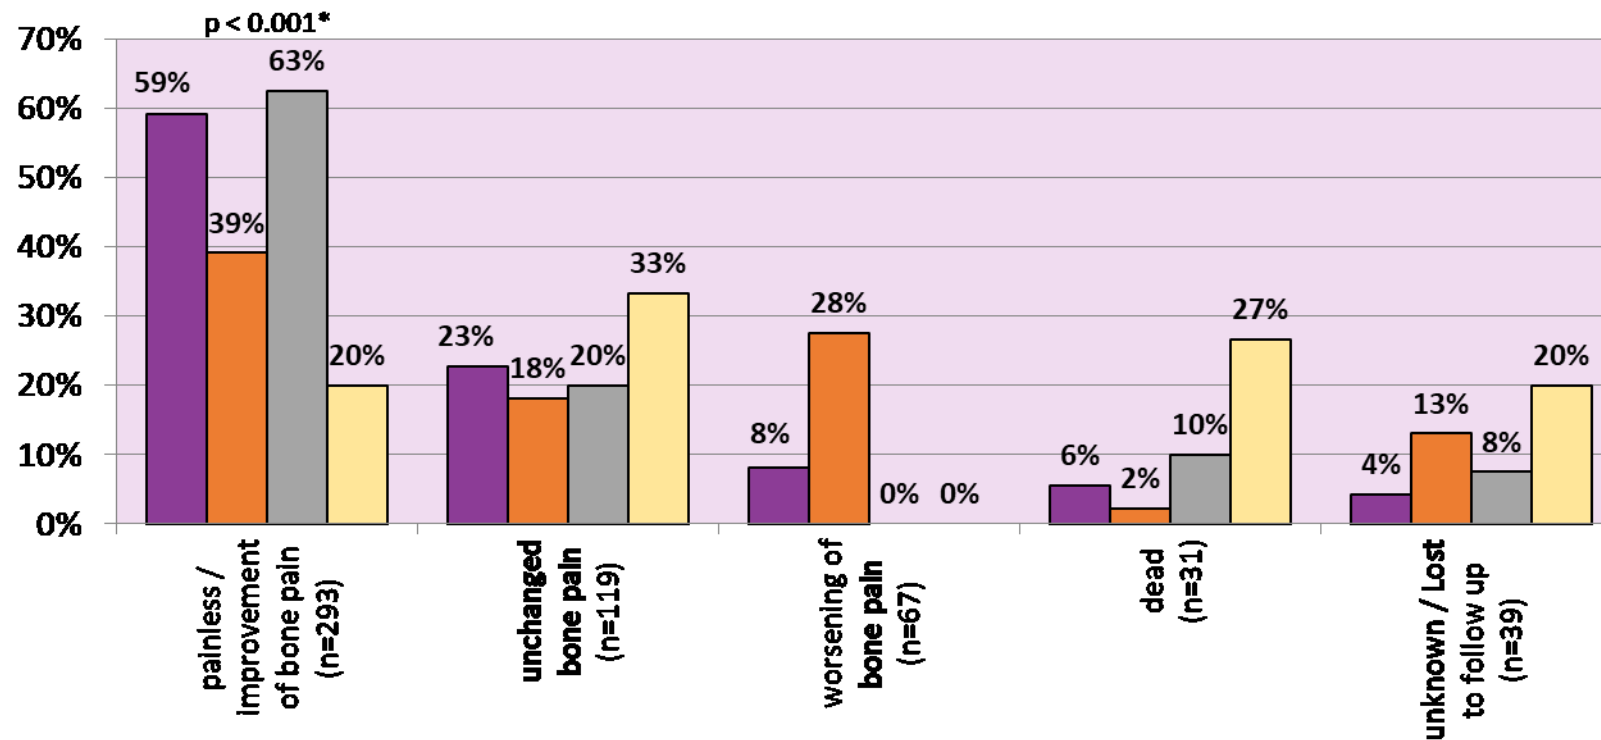

Supplement: MOESM3 [file 17071184]
