# Supplementary material for: Guideline adherence in bone-targeted treatment of cancer patients with bone metastases in Germany
Source: Springer Nature journal article supplement (doi:10.1007/s00520-019-05018-2), 2019-08-14
Supplement: MOESM2 [file 17071184]

## Supplementary material Tables S1-S3

# Guideline adherence in bone targeted treatment of cancer patients with bone metastases in Germany

Hartmut Link<sup>1</sup>

Ingo Diehl<sup>2</sup>

Carsten-H. Ohlmann<sup>3</sup>

Laura Holtmann<sup>4</sup>

Markus Kerkmann<sup>4</sup>

for the Associations Supportive Care in Oncology (AGSMO), Medical Oncology (AIO), Urological Oncology (AUO), within the German Cancer Society (DKG) and the German Osteoncological Society (DOG)

<sup>1</sup> Hämatologie, Onkologie, Pfaffplatz 10A, D- 67655 Kaiserslautern

+49 631 14102, [hlink@kabelmail.de](mailto:hlink@kabelmail.de)

ORCID 0000-0002-9659-0265

<sup>2</sup> Praxisklinik am Rosengarten, Augustaanlage 7-11, D-68165 Mannheim

<sup>3</sup> Malteser Krankenhaus Bonn/Rhein-Sieg, Von-Hompesch-Str.1, 53123 Bonn

<sup>4</sup> MMF GmbH, Heideblick 59, D-44229 Dortmund

all in Germany

## Supplementary material Tables S1-S3

Table S1: Target sample size calculation

| tumor localization | deaths<br>2010 | patient share bone<br>metastases |     | survival time<br>(median) | prevalence with<br>bone metastases |       | target<br>sample<br>size |
|--------------------|----------------|----------------------------------|-----|---------------------------|------------------------------------|-------|--------------------------|
|                    | pts            | min                              | max | months                    | min                                | max   | pts                      |
| breast cancer      | 17573          | 70%                              | 85% | 1.83                      | 22552                              | 27385 | ~ 800                    |
| prostate cancer    | 12676          | 60%                              | 80% | 1.75                      | 13310                              | 17746 | ~ 550                    |
| lung cancer        | 43008          | 40%                              | 60% | 0.5                       | 8602                               | 12902 | ~ 400                    |
| TOTAL              | 73257          | 40%                              | 85% | 0.5-1.83                  | 44068                              | 58033 | ~ 1750                   |

Table S2: Responder to phase I (health care structure): Number of centers and patients with bone metastases in 2nd half-year 2015

|                                  | Hospitals |      | office-based physicians |      | Total   |       |
|----------------------------------|-----------|------|-------------------------|------|---------|-------|
|                                  | centers   | pts  | centers                 | pts  | centers | Pts   |
| pulmonology                      | 85        | 749  | 5                       | 33   | 90      | 782   |
| gynecology                       | 158       | 7016 | 61                      | 931  | 219     | 7947  |
| urology                          | 88        | 1193 | 192                     | 2730 | 280     | 3923  |
| general hematology /<br>oncology | 77        | 925  | 81                      | 1777 | 158     | 2702  |
| TOTAL                            | 408       | 9883 | 339                     | 5471 | 747     | 15354 |

Table S3: Federal state of participating centers and patients in phase 2 (patient documentation)

| Federal state of Germany | centers | pts  |
|--------------------------|---------|------|
| Berlin                   | 17      | 138  |
| Brandenburg              | 7       | 36   |
| Bremen                   | 1       | 4    |
| Hamburg                  | 5       | 24   |
| Mecklenburg-Vorpommern   | 6       | 31   |
| Niedersachsen            | 27      | 288  |
| Schleswig-Holstein       | 5       | 24   |
| Hessen                   | 16      | 102  |
| Nordrhein-Westfalen      | 53      | 410  |
| Sachsen                  | 23      | 119  |
| Sachsen-Anhalt           | 11      | 63   |
| Thüringen                | 6       | 23   |
| Baden-Württemberg        | 26      | 160  |
| Bayern                   | 38      | 252  |
| Rheinland-Pfalz          | 4       | 47   |
| Saarland                 | 5       | 45   |
| TOTAL                    | 250     | 1766 |
